# Supplementary material for: Novel core–shell structured MgH2/AlH3@CNT nanocomposites with extremely high dehydriding–rehydriding properties derived from nanoconfinement
Source: Royal Society of Chemistry journal article supplement (doi:10.1039/d1ta01938d), 2021-01-01
Supplement: d1ta01938d1.pdf [file d1ta01938d1.pdf]

# **Novel core-shell structured $\text{MgH}_2/\text{AlH}_3@\text{CNTs}$ nanocomposites with extreme high dehydriding-rehydriding properties derived from nanoconfinement**

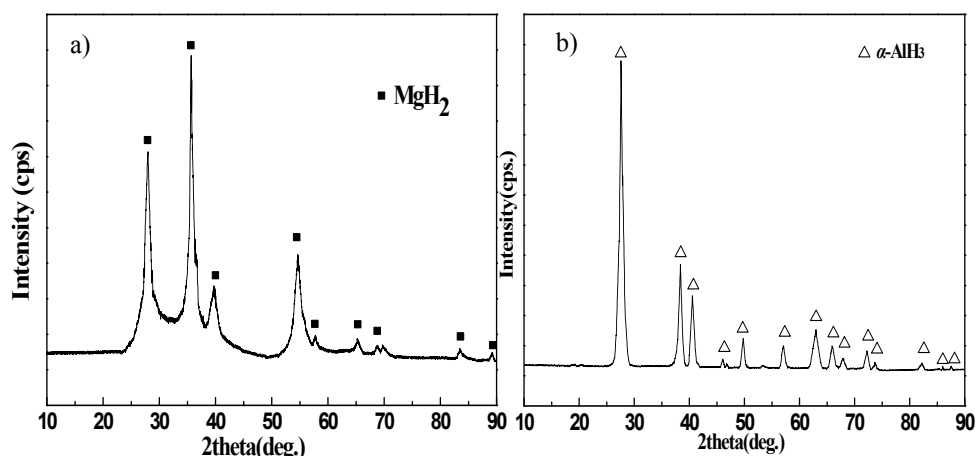

Fig. S1 XRD patterns of as-prepared a)  $\text{MgH}_2$  phase, b)  $\text{AlH}_3$  phase

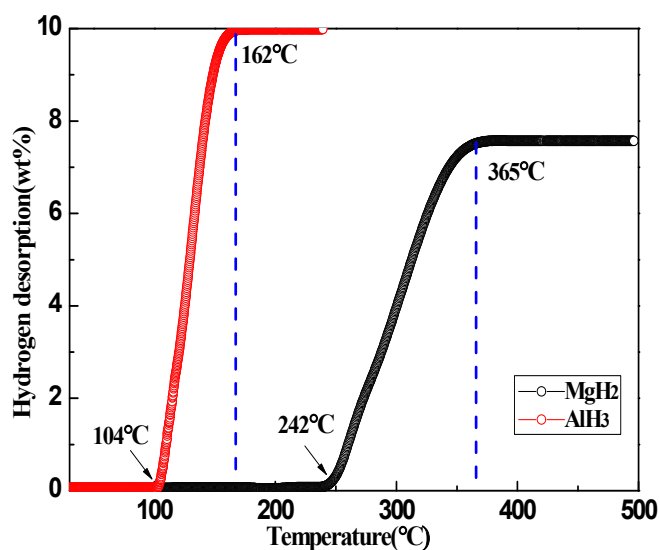

Fig. S2 temperature programmed desorption of a)  $\text{MgH}_2$ , b)  $\text{AlH}_3$ . Samples were heated from room temperature to  $500^{\circ}\text{C}$  with a rate of  $10^{\circ}\text{C}/\text{min}$ .

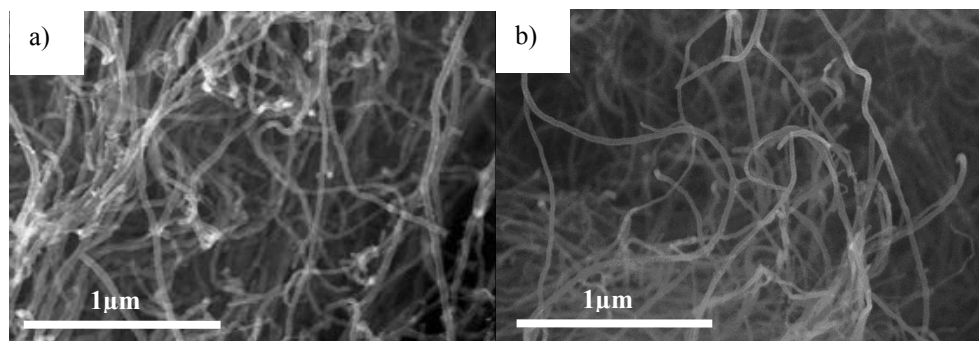

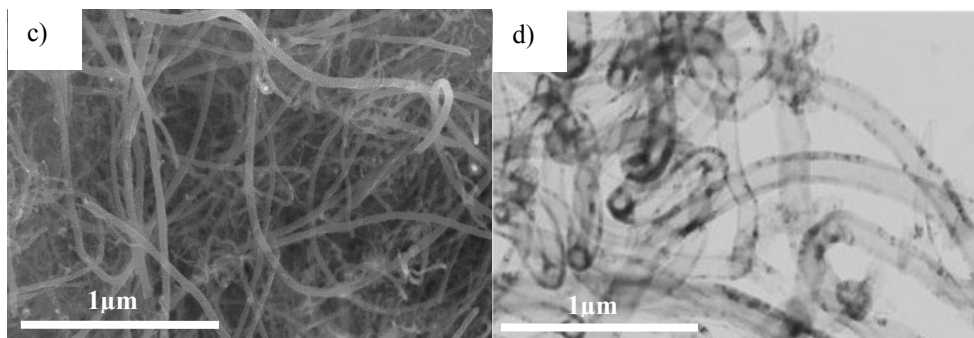

Fig. S3 SEM images of various CNTs: a)CNTs4, b)CNTs1, c)CNTs2, d)CNTs3.

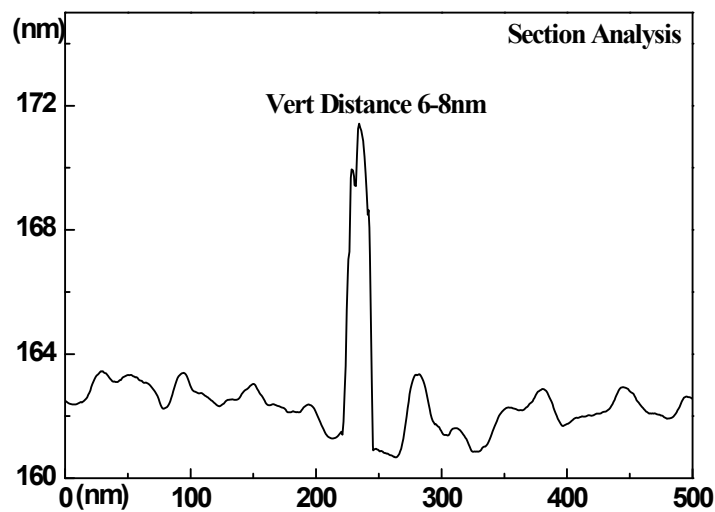

Fig. S4 Section analysis of CNTs4

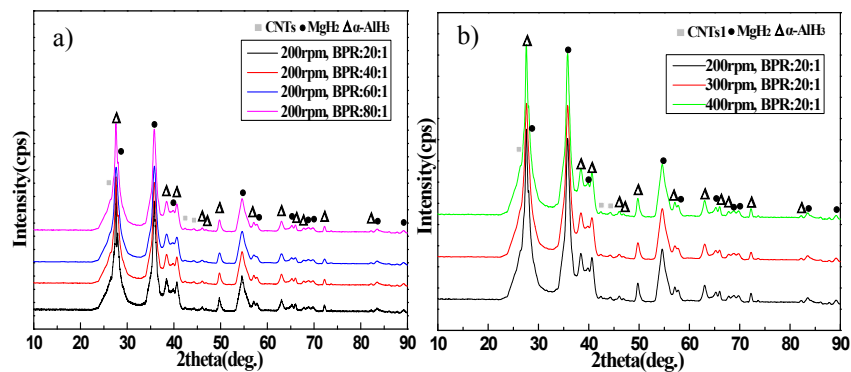

Fig. S5 XRD patterns of as-milled  $\text{MgH}_2/\text{AlH}_3@\text{CNTs1}$  obtained by milling with different ball to powder ratio and rotating speed for 1h

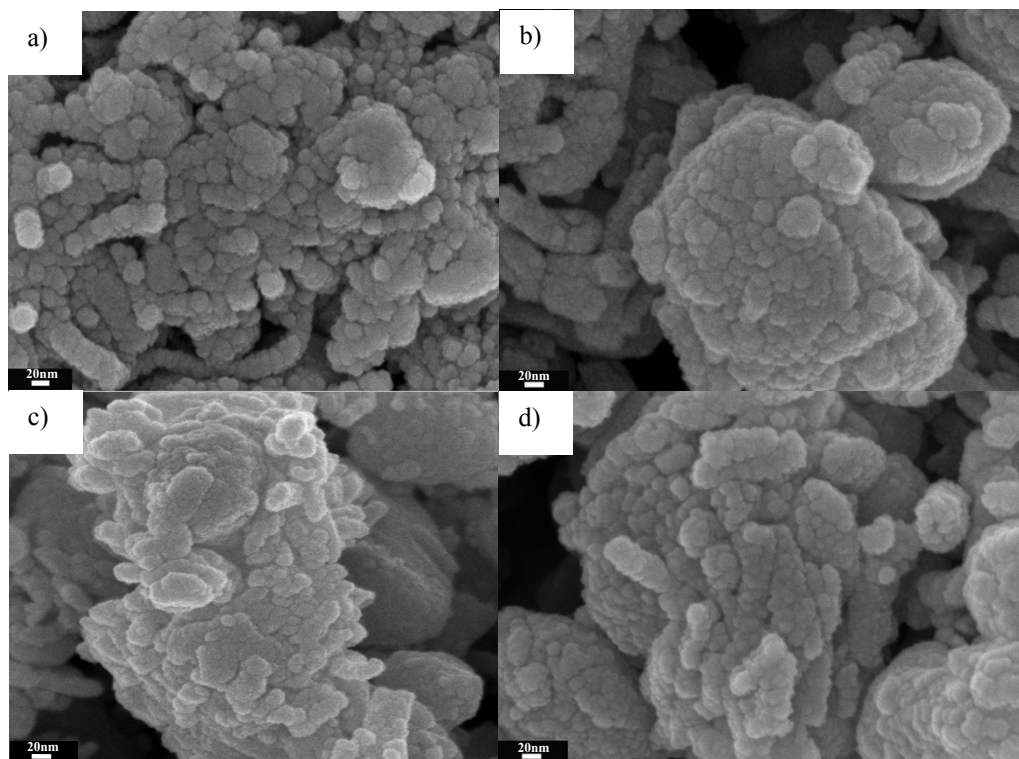

Fig. S6 SEM images of  $\text{MgH}_2/\text{AlH}_3$  wrapped with various CNTs: a)  $\text{MgH}_2/\text{AlH}_3@\text{CNTs4}$ , b)  $\text{MgH}_2/\text{AlH}_3@\text{CNTs1}$ , c)  $\text{MgH}_2/\text{AlH}_3@\text{CNTs2}$ , d)  $\text{MgH}_2/\text{AlH}_3@\text{CNTs3}$

As can be seen in Fig. S6a, most  $\text{MgH}_2/\text{AlH}_3$  particles wrapped with CNTs4 after milling for 1 h have a size of 60-80 nm, which suggests that the CNTs4 leads to particle size refining of the nanocomposite. With the CNTs transforming from 4 to 1, it is obvious that powder agglomeration was observed, with the size of most particles being in the range of 120-150 nm, as shown in Fig. S6b. For  $\text{MgH}_2/\text{AlH}_3@\text{CNTs2}$  and  $\text{MgH}_2/\text{AlH}_3@\text{CNTs3}$ , severe agglomeration or aggregation, a phenomenon somewhat like sintering of the powder particles was observed, the morphology of the particles became irregular and difficult to identify, and the size of most particles was estimated to be in the range of 200-250 nm, as shown in Fig. S6c and d.

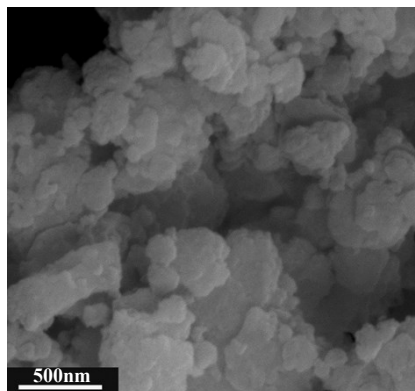

Fig. S7 SEM images of  $\text{MgH}_2/\text{AlH}_3$  nanoparticles

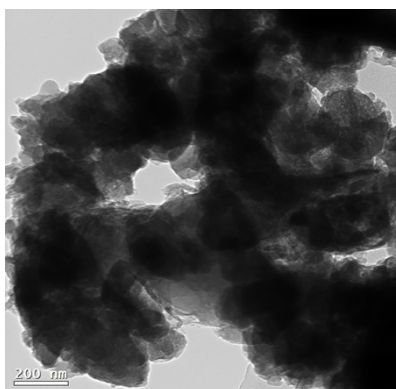

Fig. S8 TEM images of  $\text{MgH}_2/\text{AlH}_3$  nanoparticles

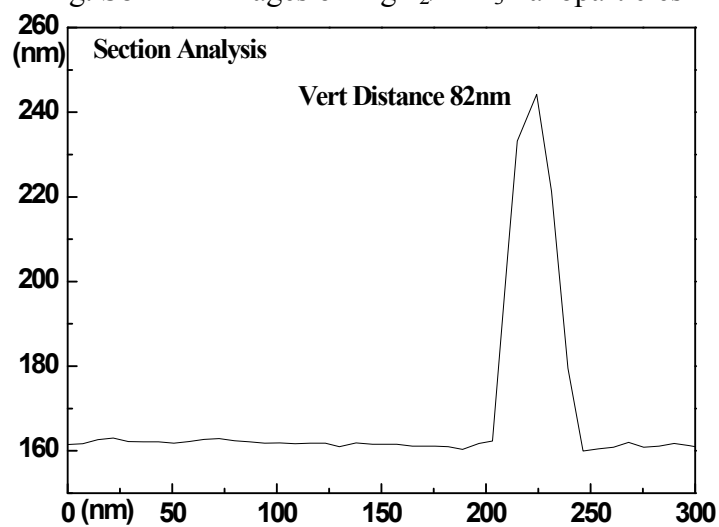

Fig. S9 Section analysis of 95%-2.5 $\text{MgH}_2/\text{AlH}_3$ @5% $\text{CNTs}$

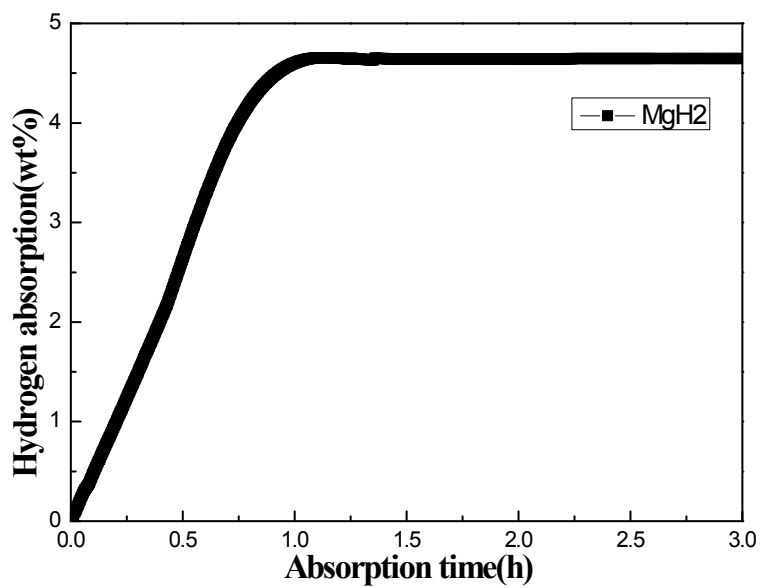

Fig. S10 Absorption property of commercial  $\text{MgH}_2$  at  $250^\circ\text{C}$  under 5MPa of  $\text{H}_2$ .
